# Supplementary material for: Genome-Wide Analysis of the Growth-Regulating Factor Family in Peanut (Arachis hypogaea L.)
Source: MDPI journal article supplement (doi:10.3390/ijms20174120), 2019-08-23
Supplement: s1 [file s1]

## Supplementary materials

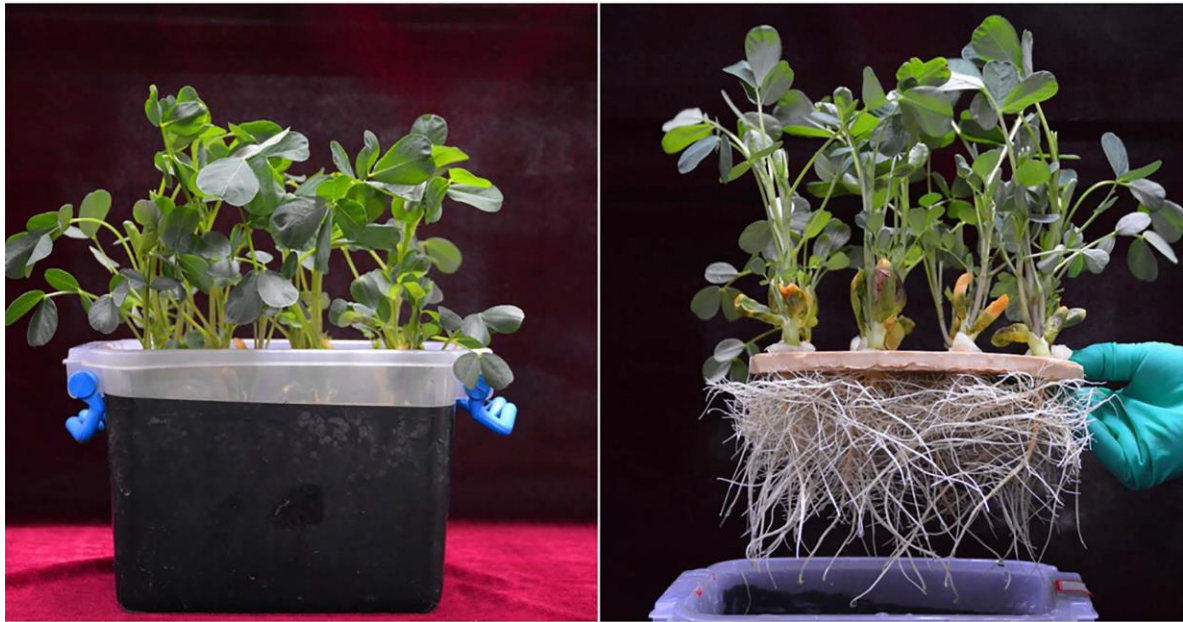

**Figure S1.** Two-week-old seedlings of H8107 grown on plates cultivated with 1/2 Hoagland solution.

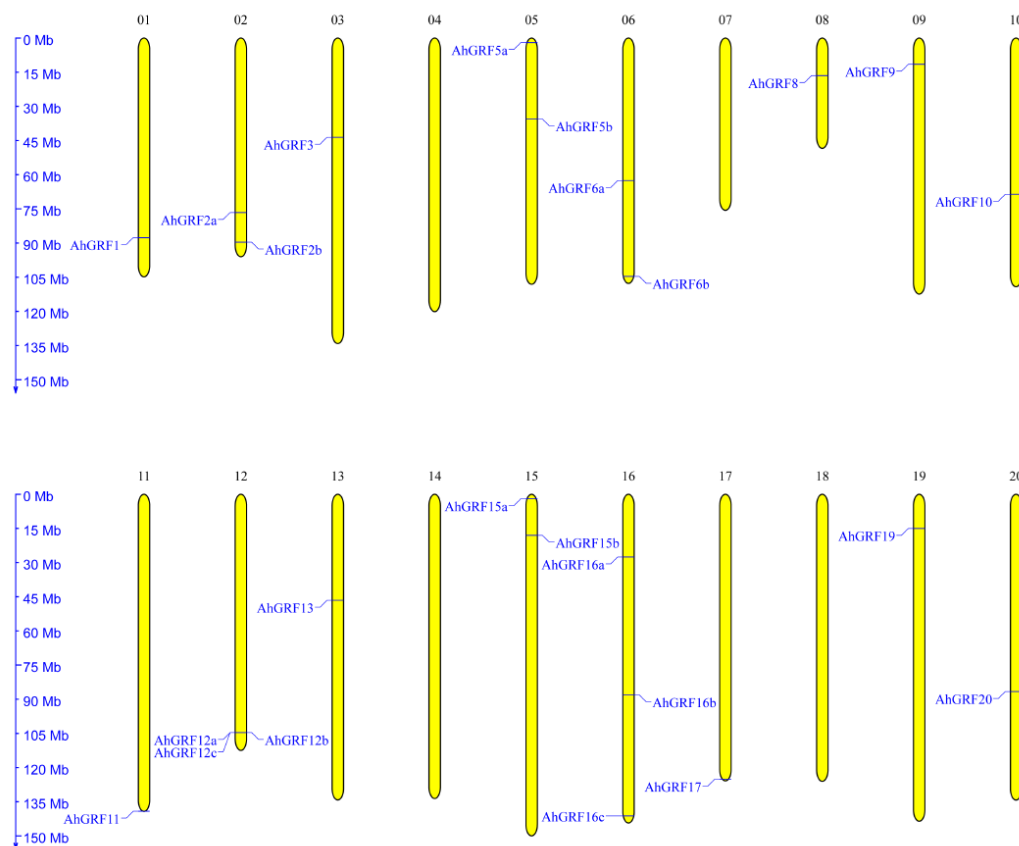

**Figure S2.** Distribution of *AhGRF* genes in the cultivated peanut genome. The chromosomal position of each *AhGRF* genes was mapped to the cultivated peanut genome. The chromosome number is indicated above each chromosome.

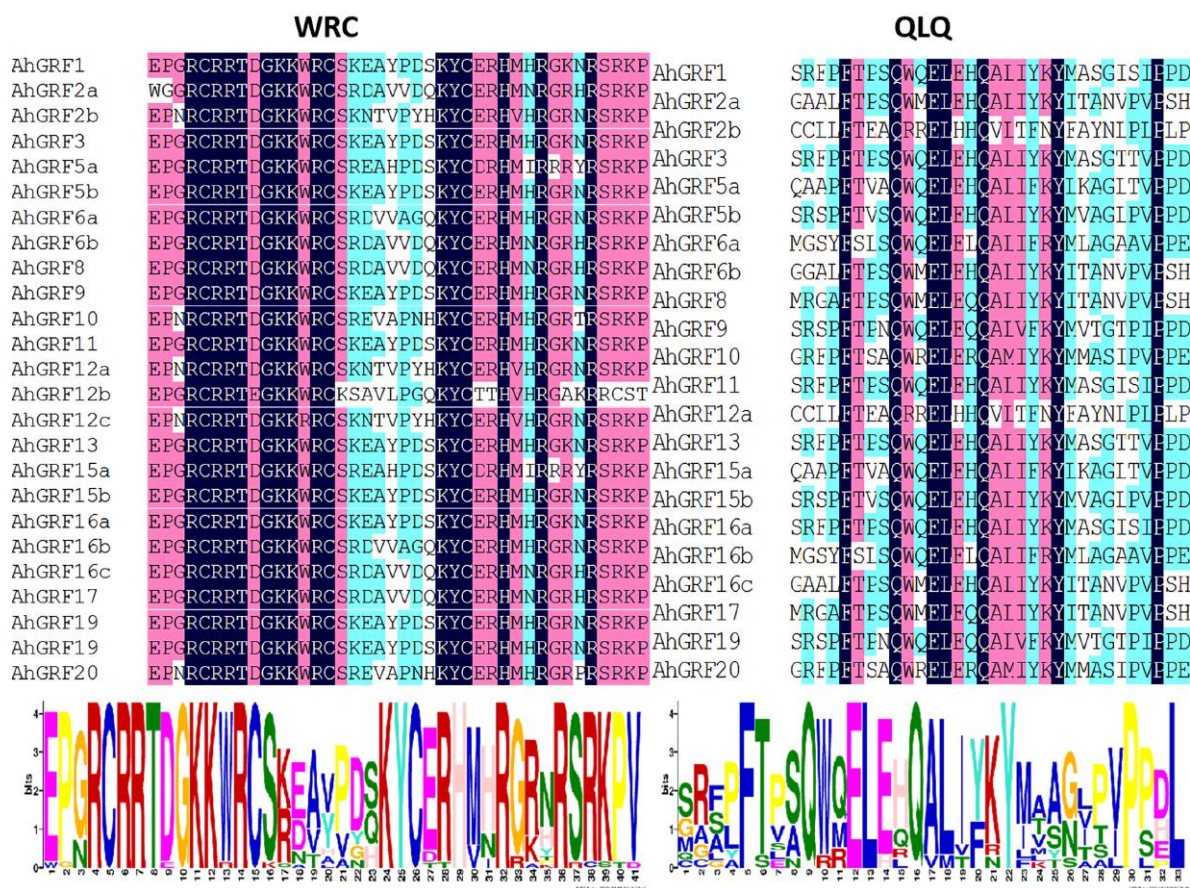

**Figure S3.** Sequence alignment of WRC and QLQ motifs in *AhGRF* genes.
